# Supplementary material for: A ventricular fibrillation cardiac arrest model with extracorporeal cardiopulmonary resuscitation in rats: 8 minutes arrest time leads to increased myocardial damage but does not increase neuronal damage compared to 6 minutes
Source: PubMed Central journal article supplement (PMC10655001; doi:10.3389/fvets.2023.1276588), 2023-11-03
Supplement: Data_Sheet_1.pdf [file Data_Sheet_1.pdf]

## *Supplementary Material*

### 1. Supplementary Figures

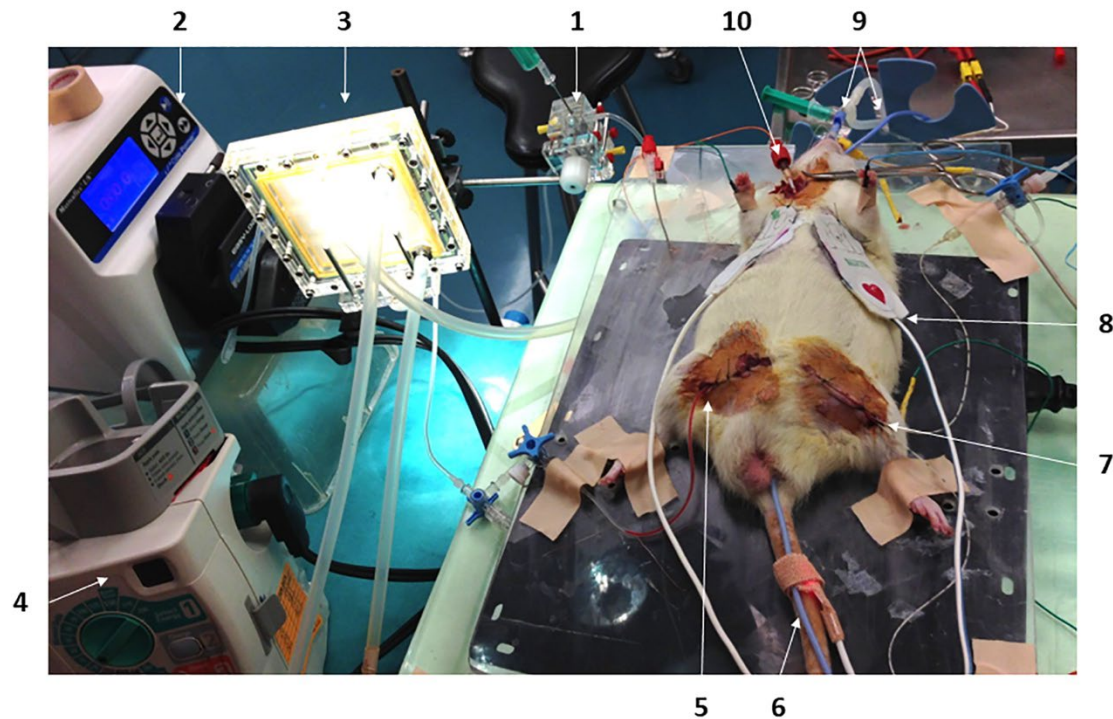

#### **Supplementary Figure 1.**

Extracorporeal cardiopulmonary resuscitation (ECPR) set-up in the rat before inducing cardiac arrest.

The anaesthetized, ventilated rat is lying on a heated table before inducing cardiac arrest. 1 open reservoir with inserted syringe and needle; 2 roller pump; 3 oxygenator connected with tubes to heat exchanger; 4 defibrillator; 5 arterial ECMO cannula access, wound provisionally closed during resuscitation; 6 rectal temperature probe; 7 arterial and venous access, wound provisionally closed during resuscitation; 8 defibrillator electrodes adapted in size; 9 endotracheal tube and esophageal temperature probe; 10 venous drainage cannula in the right jugular vein with inserted fibrillation wire, tube connection to the open reservoir not plugged in at the moment and set aside.

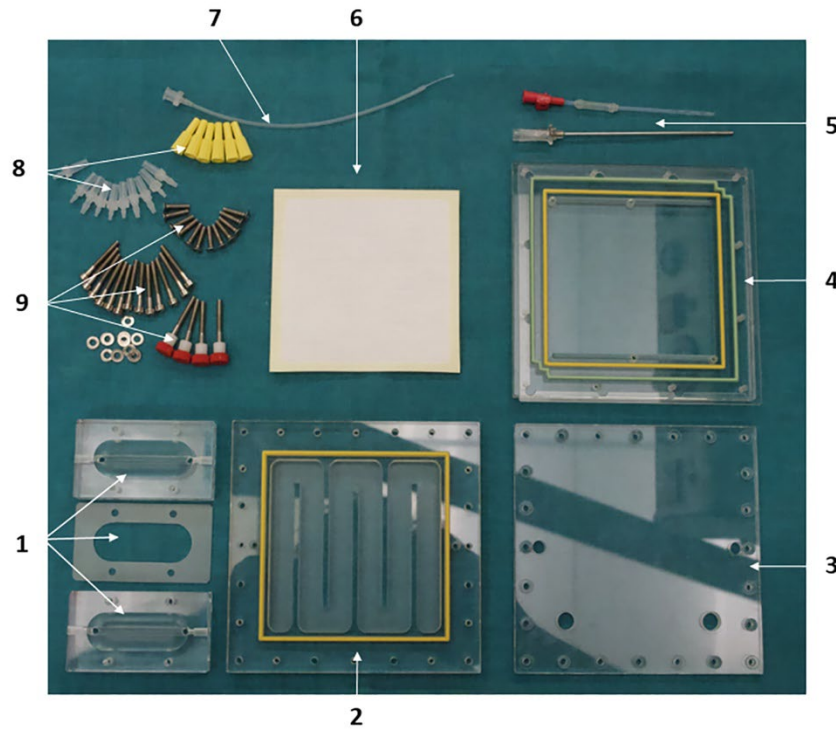

**Supplementary Figure 2.**

Parts of the ECMO oxygenator (Dipl.-Ing. Martin Humbs, Valley Germany) and arterial and venous ECMO cannula, assembled before each experiment; acrylic glass parts and metal parts cleaned and sterilized before reuse.

1 parts of open reservoir; 2 part of the oxygenator containing the milled pipes of the heat exchanger water; 3 outer cover of the heat exchanger lines; 4 casing part between which and part 2 the oxygenator membrane is inserted; 5 venous outflow cannula; 6 oxygenator membrane; 7 arterial ECMO cannula; 8 stoppers and connectors; 9 connecting screws and flat washers.

## 1. Supplementary Tables

### Supplementary Table 1

Antibodies, dilution, antigen retrieval, and chromogen used for immunohistochemistry.

| Immunohistochemistry                       |                      |                                    |                                                             |                                                |
|--------------------------------------------|----------------------|------------------------------------|-------------------------------------------------------------|------------------------------------------------|
| Primary Antibody                           | Antibody Dilution    | Antigen Retrieval                  | Secondary Antibody                                          | Chromogen                                      |
| <b>Iba 1</b><br>Rabbit AB Wako (019-19741) | 1:30.00<br>30 min RT | pH 6 citrate buffer<br>97°C 20 min | Bright Vision Goat anti Rabbit<br>HRP RTU (KL DPVR 110 HRP) | DAB Quanto (Thermo Scientific<br>#TA-125-QHDX) |
| <b>GFAP</b><br>Rabbit AB Dako (Z0334)      | 1:5000<br>30 min RT  | Pronase<br>37°C 5 min              | Bright Vision Goat anti Rabbit<br>HRP RTU (KL DPVR 110 HRP) | DAB Quanto (Thermo Scientific<br>#TA-125-QHDX) |

## Supplementary Table 2

Baseline arterial blood gas parameters in the 6 min CA group, 8 min CA group and sham group (Mean  $\pm$  SD). Parameters: pH (PH); pCO<sub>2</sub> mmHg (PCO<sub>2</sub>); pO<sub>2</sub> mmHg (PO<sub>2</sub>); Base Excess mMol/L (BE); hemoglobin g/dL (Hb); sO<sub>2</sub> % (sO<sub>2</sub>); potassium mMol/l (K<sup>+</sup>); glucose mg/dL (Gluc); lactate mMol/L(Lac).

| Base line blood gas values |                 |                 |                 |
|----------------------------|-----------------|-----------------|-----------------|
|                            | 6 min CA        | 8 min CA        | sham            |
| PH                         | 7.39 $\pm$ 0.03 | 7.41 $\pm$ 0.04 | 7.43 $\pm$ 0.03 |
| PCO <sub>2</sub>           | 35 $\pm$ 5      | 33 $\pm$ 6      | 33 $\pm$ 5      |
| PO <sub>2</sub>            | 168 $\pm$ 21    | 170 $\pm$ 36    | 180 $\pm$ 44    |
| BE                         | -3.1 $\pm$ 2.8  | -3.7 $\pm$ 3.7  | -1.8 $\pm$ 2.7  |
| Hb                         | 11.9 $\pm$ 1.4  | 11.1 $\pm$ 1.7  | 11.9 $\pm$ 1.4  |
| sO <sub>2</sub>            | 96.2 $\pm$ 3    | 96.2 $\pm$ 1.7  | 96.5 $\pm$ 1.4  |
| K <sup>+</sup>             | 3.6 $\pm$ 0.5   | 4.1 $\pm$ 0.4   | 3.9 $\pm$ 0.3   |
| Gluc                       | 148 $\pm$ 41    | 135 $\pm$ 36    | 157 $\pm$ 58    |
| Lac                        | 1.2 $\pm$ 0.3   | 1.3 $\pm$ 0.4   | 1.2 $\pm$ 0.2   |

## Supplementary Table 3

Arterial blood gas analysis 5 min post ROSC in all study groups. Mean  $\pm$  SD of the 5 min post Return of Spontaneous Circulation (pROSC) arterial blood gas parameters in the 6 min CA group, 8 min CA group and sham group. Parameters: pH (PH); pCO<sub>2</sub> mmHg (PCO<sub>2</sub>); pO<sub>2</sub> mmHg (PO<sub>2</sub>); Base Excess mMol/L (BE); Hemoglobin g/dL (Hb); sO<sub>2</sub> % (sO<sub>2</sub>); potassium mMol/l (K<sup>+</sup>); glucose mg/dL (Gluc); lactate mMol/L(Lac).

| 5 min pRosc |           |           |           |
|-------------|-----------|-----------|-----------|
|             | 6 min CA  | 8 min CA  | sham      |
| PH          | 7.04±0.08 | 7.10±0.08 | 7.40±0.02 |
| PCO2        | 44±6      | 44±8      | 38±2      |
| PO2         | 184±72    | 165±51    | 141±62    |
| BE          | -17.1±3.9 | -14.6±3.3 | -1±1.5    |
| Hb          | 8.6±1.2   | 9.1±1     | 12.6±0.3  |
| sO2         | 92±6      | 101±44    | 96±1      |
| K+          | 3.8±0.8   | 4±0.6     | 4.4±0.3   |
| Gluc        | 260±74    | 258±57    | 133±23    |
| Lac         | 9.2±2.2   | 8.6±1.6   | 1.2±0.6   |

#### Supplementary Table 4

Arterial blood gas analysis 15 min post ROSC in all study groups. Mean ± SD of the 15 minutes (min) post Return of Spontaneous Circulation (pROSC) arterial blood gas parameters in the 6 min CA group, 8 min CA group and sham group. Parameters: pH (PH); pCO<sub>2</sub> mmHg (PCO<sub>2</sub>); pO<sub>2</sub> mmHg (PO<sub>2</sub>); Base Excess mMol/L (BE); Hemoglobin g/dL (Hb); sO<sub>2</sub> % (sO<sub>2</sub>); potassium mMol/l (K<sup>+</sup>); glucose mg/dL (Gluc); lactate mMol/L (Lac).

| 15 min post Rosc |           |           |           |
|------------------|-----------|-----------|-----------|
|                  | 6 min CA  | 8 min CA  | sham      |
| PH               | 7.18±0.06 | 7.23±0.07 | 7.41±0.02 |
| PCO2             | 37±5      | 36±5      | 37±3      |
| PO2              | 206±66    | 195±36    | 145±30    |
| BE               | -13.3±3.3 | -9.8±6.9  | -1.1±2.4  |
| Hb               | 10±1.3    | 11.2±1    | 12.4±0.7  |
| sO2              | 96±2      | 96±2      | 97±2      |
| K+               | 3.1±0.8   | 3.8±0.4   | 4.4±0.4   |
| Gluc             | 218±34    | 273±57    | 137±32    |
| Lac              | 6±1.9     | 7.5±2.4   | 1.1±0.6   |

#### Supplementary Table 5

Arterial blood gas analysis 60 min post ROSC in all study groups. Mean ± SD of the 60 minutes (min) post Return of Spontaneous Circulation (pROSC) arterial blood gas parameters in the 6 min CA group, 8 min CA group and sham group. Parameters: pH (PH); pCO<sub>2</sub> mmHg (PCO<sub>2</sub>); pO<sub>2</sub>

mmHg (PO<sub>2</sub>); Base Excess mMol/L (BE); Hemoglobin g/dL (Hb); sO<sub>2</sub> % (sO<sub>2</sub>); potassium mMol/l (K<sup>+</sup>); glucose mg/dL (Gluc); lactate mMol/L (Lac).

| 60 min post Rosc |           |           |           |
|------------------|-----------|-----------|-----------|
|                  | 6 min CA  | 8 min CA  | sham      |
| PH               | 7.36±0.06 | 7.39±0.04 | 7.44±0.03 |
| PCO <sub>2</sub> | 33±4      | 38±8      | 34±7      |
| PO <sub>2</sub>  | 189±57    | 184±74    | 164±29    |
| BE               | -6.2±4.7  | -2.3±3.3  | -1.3±3.3  |
| Hb               | 9.9±0.8   | 11.2±1.3  | 11.8±1.6  |
| sO <sub>2</sub>  | 96±2      | 94±5      | 97±1      |
| K <sup>+</sup>   | 3.6±0.8   | 4.5±0.5   | 4.2±0.5   |
| Gluc             | 130±41    | 138±49    | 150±30    |
| Lac              | 2.2±1.6   | 2.9±2.8   | 1.1±0.4   |
